# Supplementary material for: Investigation on the Contents of Nε-carboxymethyllysine, Nε-carboxyethyllysine, and N-nitrosamines in Commercial Sausages on the Chinese Market
Source: MDPI journal article supplement (doi:10.3390/foods12040724), 2023-02-07
Supplement: s1 [file s1]

**Table S1** MRM settings for CML, CEL,  $\alpha$ -dicarbonyls, and NAs detection.

| Compound             | Precursor ion | Product ion | Fragmentor (v) | Collision<br>Energy (ev) | Dwell Time (ms) |
|----------------------|---------------|-------------|----------------|--------------------------|-----------------|
| CML                  | 205           | 130         | 60             | 10                       | 50              |
|                      |               | 84*         | 60             | 12                       | 50              |
| d <sub>4</sub> -CML  | 209           | 134         | 60             | 9                        | 50              |
|                      |               | 88*         | 60             | 13                       | 50              |
| CEL                  | 219           | 130         | 60             | 10                       | 50              |
|                      |               | 84*         | 60             | 12                       | 50              |
| d <sub>4</sub> -CEL  | 223           | 134         | 60             | 11                       | 50              |
|                      |               | 88*         | 60             | 13                       | 50              |
| 3-DG                 | 235           | 199*        | 75             | 14                       | 30              |
|                      |               | 171         | 75             | 27                       | 30              |
| DA                   | 159           | 118         | 80             | 24                       | 30              |
|                      |               | 77*         | 80             | 38                       | 30              |
| MGO                  | 145           | 92          | 60             | 21                       | 30              |
|                      |               | 77*         | 60             | 33                       | 30              |
| GO                   | 131           | 77*         | 50             | 31                       | 30              |
|                      |               | 55          | 50             | 50                       | 30              |
| NDMA                 | 74            | 42          |                | 20                       | 120             |
|                      |               | 44*         |                | 5                        | 120             |
| NDMA-d <sub>6</sub>  | 80            | 48          |                | 7                        | 120             |
|                      |               | 50*         |                | 3                        | 120             |
| NDEA                 | 102           | 56          |                | 17                       | 90              |
|                      |               | 85*         |                | 3                        | 90              |
| NDEA-d <sub>10</sub> | 112           | 62          |                | 15                       | 90              |
|                      |               | 94*         |                | 5                        | 90              |
| NMEA                 | 88            | 42          |                | 18                       | 80              |
|                      |               | 71*         |                | 2                        | 80              |
| NDPA                 | 130           | 43          |                | 10                       | 70              |
|                      |               | 113*        |                | 0                        | 70              |
| NMOR                 | 116           | 56          |                | 12                       | 70              |
|                      |               | 86*         |                | 1                        | 70              |
| NPIP                 | 114           | 97          |                | 7                        | 90              |
|                      |               | 84*         |                | 7                        | 90              |
| NPYR                 | 100           | 55*         |                | 7                        | 70              |
|                      |               | 70          |                | 5                        | 70              |
| NPYR-d <sub>8</sub>  | 108           | 62          |                | 7                        | 70              |
|                      |               | 78*         |                | 5                        | 70              |
| NDBA                 | 158           | 99          |                | 5                        | 120             |
|                      |               | 141*        |                | 0                        | 120             |
| NDPHA                | 169           | 167         |                | 30                       | 100             |
|                      |               | 168*        |                | 17                       | 100             |

\* Indicates ion pairs for quantification.

**Table S2** The performance of NAs.

| NAs                            | NDMA   | NDEA    | NMEA   | NDPA   | NPIP   | NMOR   | NPYR    | NDBA   | NDPhA  |
|--------------------------------|--------|---------|--------|--------|--------|--------|---------|--------|--------|
| Coefficients (R <sup>2</sup> ) | 0.9995 | 0.9994  | 0.9996 | 0.9997 | 0.9997 | 0.9996 | 0.9990  | 0.9996 | 0.9997 |
| LOD (µg/kg)                    | 0.5    | 0.2     | 0.4    | 0.4    | 0.1    | 0.5    | 0.9     | 0.1    | 0.02   |
| LOQ (µg/kg)                    | 1.6    | 0.6     | 1.3    | 1.3    | 0.3    | 1.6    | 2.8     | 0.3    | 0.06   |
| Recovery (%)                   | 85-104 | 101-113 | 77-93  | 82-85  | 89-97  | 85-98  | 111-116 | 75-76  | 87-99  |

**Table S3** Moisture, fat, protein contents, pH, and TBARS values of commercial sausages in the Chinese market.

| Samples                        | Moisture (%) | Fat (%)      | Protein (%)  | pH          | TBARS (mg/kg) |
|--------------------------------|--------------|--------------|--------------|-------------|---------------|
| Salami Al tartufo (F1)         | 38.16        | 26.93 ± 2.21 | 24.84 ± 0.63 | 5.03 ± 0.04 | 10.49 ± 0.85  |
| Salami Toscano (F2)            | 39.29        | 25.89 ± 1.91 | 27.02 ± 0.15 | 5.63 ± 0.05 | 6.93 ± 0.63   |
| Pepperoni (F3)                 | 31.49        | 38.11 ± 0.50 | 23.83 ± 0.62 | 4.89 ± 0.01 | 4.31 ± 0.57   |
| Basitides (F4)                 | 31.77        | 31.03 ± 0.49 | 29.20 ± 0.97 | 5.34 ± 0.02 | 13.35 ± 0.43  |
| Salami Ungherese (F5)          | 37.21        | 29.75 ± 1.67 | 23.86 ± 0.01 | 5.42 ± 0.06 | 1.98 ± 0.28   |
| Salami Milano (F6)             | 31.78        | 33.19 ± 0.28 | 27.12 ± 1.09 | 4.97 ± 0.02 | 12.28 ± 0.27  |
| Salami Napoli (F7)             | 32.30        | 34.41 ± 1.82 | 25.75 ± 1.64 | 4.95 ± 0.04 | 14.69 ± 1.53  |
| TULIP Hungarian Salami (F8)    | 39.29        | 32.09 ± 1.32 | 20.52 ± 0.99 | 4.96 ± 0.03 | 1.44 ± 0.14   |
| Palacios original chorizo (F9) | 23.57        | 43.25 ± 0.66 | 24.07 ± 0.69 | 5.82 ± 0.02 | 1.65 ± 0.13   |

|                             |       |              |              |             |              |
|-----------------------------|-------|--------------|--------------|-------------|--------------|
| Average                     | 30.00 | 34.65        | 24.42        | 5.49        | 8.14         |
| Sichuan spicy sausage (F11) | 21.16 | 43.03 ± 0.41 | 23.27 ± 0.07 | 6.40 ± 0.05 | 5.84 ± 0.10  |
| Tian Chinese Sausage (F12)  | 19.85 | 36.83 ± 1.50 | 24.74 ± 4.18 | 6.37 ± 0.03 | 14.77 ± 1.30 |
| Harbin Red Sausage (C1)     | 55.23 | 10.19 ± 0.43 | 14.12 ± 0.74 | 6.64 ± 0.03 | 1.72 ± 0.25  |
| Garlic Red Sausage (C2)     | 59.41 | 15.17 ± 0.42 | 14.43 ± 0.29 | 6.50 ± 0.03 | 2.37 ± 0.41  |
| Shanghai Red Sausage (C3)   | 65.88 | 3.87 ± 0.39  | 15.40 ± 0.41 | 6.50 ± 0.04 | 3.04 ± 0.12  |
| Beidaihe Sausage (C4)       | 62.09 | 3.47 ± 0.25  | 26.72 ± 0.18 | 6.45 ± 0.05 | 1.71 ± 0.16  |
| Fried Sausage (C5)          | 63.23 | 10.72 ± 0.24 | 14.07 ± 0.16 | 6.48 ± 0.02 | 4.43 ± 0.28  |
| Tender Square Sausage (C6)  | 67.67 | 3.30 ± 1.40  | 11.71 ± 0.02 | 6.61 ± 0.05 | 3.33 ± 0.18  |
| Jinluo Ham Sausage (C7)     | 68.90 | 2.87 ± 0.22  | 14.48 ± 0.15 | 6.54 ± 0.02 | 3.39 ± 0.67  |
| Jinluo Chicken Sausage (C8) | 63.55 | 5.83 ± 2.04  | 10.02 ± 0.03 | 6.88 ± 0.04 | 1.36 ± 0.28  |
| Shuanghui Corn Sausage (C9) | 67.12 | 0.89 ± 0.09  | 10.92 ± 0.01 | 6.79 ± 0.03 | 2.28 ± 0.46  |
| Average                     | 63.67 | 6.26         | 14.65        | 6.60        | 2.62         |

**Table S4**  $\alpha$ -Dicarbonyls, CML, and CEL concentrations in sausages (mg/kg).

| Samples | 3-DG            | DA              | MGO             | GO              | Sum of 4 $\alpha$ -DCs | CML              | CEL              | Sum of CML and CEL |
|---------|-----------------|-----------------|-----------------|-----------------|------------------------|------------------|------------------|--------------------|
| F1      | $0.80 \pm 0.08$ | $0.20 \pm 0.01$ | $2.14 \pm 0.19$ | $1.66 \pm 0.14$ | $4.80 \pm 0.40$        | $34.82 \pm 5.96$ | $11.17 \pm 0.37$ | $45.9 \pm 6.33$    |
| F2      | $0.58 \pm 0.11$ | $0.18 \pm 0.02$ | $0.81 \pm 0.01$ | $1.55 \pm 0.11$ | $3.12 \pm 0.17$        | $17.89 \pm 0.36$ | $13.42 \pm 1.19$ | $31.31 \pm 1.33$   |
| F3      | $0.69 \pm 0.09$ | $0.28 \pm 0.02$ | $2.18 \pm 0.11$ | $0.97 \pm 0.08$ | $4.12 \pm 0.28$        | $12.98 \pm 1.02$ | $14.30 \pm 2.08$ | $27.28 \pm 3.03$   |
| F4      | $0.49 \pm 0.09$ | $0.25 \pm 0.00$ | $1.99 \pm 0.09$ | $1.06 \pm 0.07$ | $3.80 \pm 0.19$        | $20.92 \pm 4.22$ | $14.74 \pm 0.84$ | $35.67 \pm 3.47$   |
| F5      | $0.23 \pm 0.04$ | $0.26 \pm 0.03$ | $0.65 \pm 0.18$ | $1.10 \pm 0.15$ | $1.87 \pm 0.83$        | $7.38 \pm 1.27$  | $8.26 \pm 0.37$  | $15.64 \pm 1.56$   |
| F6      | nd              | $0.16 \pm 0.00$ | $1.11 \pm 0.12$ | $1.77 \pm 0.11$ | $3.05 \pm 0.23$        | $14.97 \pm 0.79$ | $10.40 \pm 2.60$ | $25.37 \pm 1.93$   |
| F7      | $0.37 \pm 0.02$ | $0.18 \pm 0.01$ | $2.14 \pm 0.08$ | $1.36 \pm 0.03$ | $4.05 \pm 0.12$        | $21.13 \pm 0.54$ | $10.40 \pm 0.29$ | $31.54 \pm 0.58$   |
| F8      | nd              | $0.28 \pm 0.00$ | $2.57 \pm 0.09$ | $1.59 \pm 0.12$ | $4.44 \pm 0.09$        | $8.07 \pm 2.23$  | $10.69 \pm 2.25$ | $18.76 \pm 4.48$   |
| F9      | $2.92 \pm 0.21$ | $0.76 \pm 0.04$ | $1.66 \pm 0.02$ | $1.46 \pm 0.15$ | $6.57 \pm 0.59$        | $9.38 \pm 0.75$  | $22.99 \pm 1.80$ | $32.37 \pm 1.50$   |
| F10     | $6.93 \pm 0.58$ | $0.09 \pm 0.02$ | $0.68 \pm 0.04$ | $0.09 \pm 0.06$ | $7.79 \pm 0.65$        | $15.98 \pm 2.35$ | $21.85 \pm 1.08$ | $37.83 \pm 3.20$   |
| F11     | $4.93 \pm 0.10$ | $0.13 \pm 0.01$ | $3.06 \pm 0.11$ | $0.21 \pm 0.03$ | $8.35 \pm 0.21$        | $12.07 \pm 0.36$ | $52.32 \pm 2.34$ | $68.24 \pm 6.94$   |
| F12     | $0.38 \pm 0.02$ | $0.10 \pm 0.01$ | $0.43 \pm 0.01$ | $0.20 \pm 0.05$ | $1.11 \pm 0.08$        | $11.69 \pm 7.71$ | $10.83 \pm 1.23$ | $24.50 \pm 4.84$   |
| Average | 1.53            | 0.24            | 1.62            | 1.08            | 4.47                   | 15.61            | 16.78            | 32.87              |
| C1      | $1.39 \pm 0.13$ | $0.32 \pm 0.02$ | $2.25 \pm 0.23$ | $1.19 \pm 0.11$ | $5.15 \pm 0.46$        | $15.17 \pm 0.15$ | $13.91 \pm 2.78$ | $33.21 \pm 9.89$   |
| C2      | $1.18 \pm 0.05$ | $0.29 \pm 0.04$ | $1.71 \pm 0.08$ | $1.19 \pm 0.14$ | $4.38 \pm 0.18$        | $8.90 \pm 2.08$  | $14.22 \pm 0.89$ | $23.12 \pm 2.97$   |

|         |             |             |             |             |             |              |              |              |
|---------|-------------|-------------|-------------|-------------|-------------|--------------|--------------|--------------|
| C3      | 0.90 ± 0.10 | 0.08 ± 0.00 | 0.21 ± 0.06 | 0.06 ± 0.04 | 1.25 ± 0.19 | 3.67 ± 0.31  | 5.89 ± 0.99  | 9.56 ± 1.30  |
| C4      | 0.61 ± 0.07 | 0.16 ± 0.01 | 0.79 ± 0.03 | 0.13 ± 0.03 | 1.69 ± 0.14 | 46.11 ± 1.05 | 47.55 ± 3.13 | 96.61 ± 9.05 |
| C5      | 0.60 ± 0.05 | 0.22 ± 0.07 | 1.89 ± 0.28 | 0.12 ± 0.05 | 2.84 ± 0.44 | 5.51 ± 0.42  | 17.05 ± 1.05 | 22.56 ± 1.05 |
| C6      | 3.14 ± 0.19 | 0.12 ± 0.01 | 0.75 ± 0.08 | 0.05 ± 0.03 | 4.07 ± 0.29 | 6.14 ± 0.09  | 8.62 ± 0.15  | 14.76 ± 0.24 |
| C7      | 0.74 ± 0.06 | 0.15 ± 0.02 | 1.50 ± 0.03 | 0.08 ± 0.02 | 2.68 ± 0.47 | 4.98 ± 0.42  | 16.20 ± 1.03 | 21.18 ± 1.37 |
| C8      | 0.69 ± 0.05 | 0.15 ± 0.01 | 1.14 ± 0.06 | 0.27 ± 0.06 | 2.25 ± 0.17 | 6.76 ± 0.13  | 9.80 ± 0.24  | 16.56 ± 0.22 |
| C9      | 1.29 ± 0.10 | 0.20 ± 0.01 | 1.70 ± 0.10 | 0.14 ± 0.04 | 3.33 ± 0.21 | 7.86 ± 0.38  | 15.40 ± 0.66 | 23.26 ± 0.90 |
| Average | 1.17        | 0.19        | 1.33        | 0.36        | 3.05        | 11.68        | 16.52        | 28.98        |

<sup>1</sup> nd means not detected.

**Table S5** N-nitrosamines contents of collected sausages (µg/kg).

| Samples | NDEA        | NMEA | NDMA         | NDPA | NMOR | NPIP        | NPYR | NDBA        | NDPhA       | Sum          |
|---------|-------------|------|--------------|------|------|-------------|------|-------------|-------------|--------------|
| F1      | 1.61 ± 0.30 | nd   | 8.18 ± 2.08  | nd   | nd   | 1.50 ± 0.14 | nd   | 0.80 ± 0.14 | 0.08 ± 0.10 | 12.90 ± 3.64 |
| F2      | 1.04 ± 0.23 | nd   | 8.59 ± 1.77  | nd   | nd   | 3.79 ± 0.48 | nd   | nd          | 0.20 ± 0.11 | 13.02 ± 2.96 |
| F3      | 1.25 ± 0.17 | nd   | 8.05 ± 0.29  | nd   | nd   | 0.58 ± 0.06 | nd   | nd          | 0.51 ± 0.12 | 10.39 ± 0.46 |
| F4      | 1.14 ± 0.04 | nd   | 6.10 ± 0.24  | nd   | nd   | 1.70 ± 0.25 | nd   | 0.62 ± 0.03 | 0.37 ± 0.32 | 9.95 ± 0.28  |
| F5      | 1.59 ± 0.01 | nd   | 6.28 ± 0.97  | nd   | nd   | 0.48 ± 0.14 | nd   | 0.81 ± 0.12 | 0.13 ± 0.10 | 15.88 ± 1.27 |
| F6      | 2.18 ± 0.27 | nd   | 10.39 ± 1.08 | nd   | nd   | 2.05 ± 0.15 | nd   | 1.13 ± 0.12 | 0.20 ± 0.19 | 15.63 ± 0.95 |

|         |             |    |              |    |    |             |              |             |             |              |
|---------|-------------|----|--------------|----|----|-------------|--------------|-------------|-------------|--------------|
| F7      | 2.00 ± 0.40 | nd | 10.52 ± 0.39 | nd | nd | 1.96 ± 0.13 | nd           | 0.94 ± 0.10 | 0.21 ± 0.02 | 6.86 ± 3.73  |
| F8      | 1.46 ± 1.04 | nd | 4.80 ± 2.90  | nd | nd | nd          | nd           | 0.39 ± 0.22 | 2.07 ± 0.20 | 9.14 ± 1.81  |
| F9      | 1.35 ± 0.34 | nd | 5.71 ± 1.79  | nd | nd | nd          | nd           | nd          | 0.16 ± 0.01 | 1.37 ± 0.47  |
| F10     | 1.88 ± 0.01 | nd | 4.30 ± 0.82  | nd | nd | 0.27 ± 0.07 | nd           | 0.49 ± 0.05 | 0.47 ± 0.37 | 1.36 ± 0.31  |
| F11     | 1.39 ± 0.13 | nd | 4.25 ± 0.74  | nd | nd | nd          | nd           | nd          | 0.13 ± 0.18 | 6.93 ± 1.65  |
| F12     | 1.60 ± 0.41 | nd | 6.35 ± 1.39  | nd | nd | 0.23 ± 0.06 | nd           | nd          | 0.24 ± 0.08 | 8.47 ± 3.89  |
| Average | 1.54        | 0  | 6.96         | 0  | 0  | 1.05        | 0            | 0.37        | 0.40        | 9.32         |
| C1      | 1.20 ± 0.48 | nd | nd           | nd | nd | nd          | nd           | nd          | 0.26 ± 0.07 | 4.17 ± 0.88  |
| C2      | 0.89 ± 0.64 | nd | nd           | nd | nd | nd          | nd           | nd          | 0.25 ± 0.22 | 7.19 ± 0.67  |
| C3      | 0.89 ± 0.03 | nd | 5.51 ± 0.16  | nd | nd | nd          | nd           | nd          | 0.50 ± 0.30 | 9.67 ± 1.08  |
| C4      | 1.29 ± 0.70 | nd | nd           | nd | nd | nd          | nd           | nd          | 0.25 ± 0.08 | 1.35 ± 0.56  |
| C5      | 2.13 ± 0.04 | nd | 6.09 ± 2.94  | nd | nd | nd          | nd           | nd          | 0.34 ± 0.07 | 5.99 ± 0.88  |
| C6      | 1.06 ± 0.01 | nd | 2.84 ± 0.68  | nd | nd | nd          | nd           | nd          | 0.42 ± 0.11 | 8.60 ± 1.83  |
| C7      | 2.53 ± 0.17 | nd | 5.11 ± 0.40  | nd | nd | nd          | nd           | 1.08 ± 0.04 | 0.46 ± 0.27 | 9.07 ± 0.25  |
| C8      | 2.08 ± 0.19 | nd | 5.14 ± 0.46  | nd | nd | nd          | nd           | nd          | 0.39 ± 0.08 | 7.61 ± 0.58  |
| C9      | 1.86 ± 0.19 | nd | 4.31 ± 0.59  | nd | nd | nd          | 71.73 ± 2.95 | 2.20 ± 0.12 | 0.34 ± 0.09 | 80.31 ± 2.80 |
| Average | 1.57        | 0  | 3.22         | 0  | 0  | 0           | 7.97         | 0.35        | 0.36        | 14.88        |

<sup>1</sup> nd means not detected.

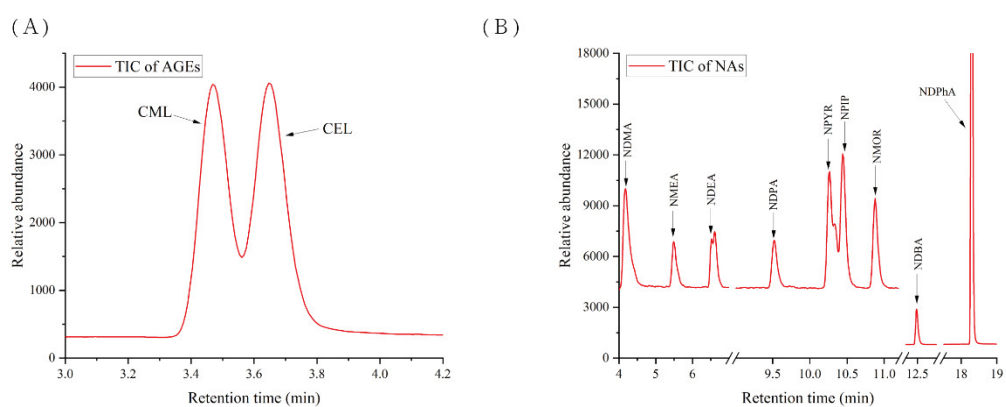

**Figure S1.** Representative chromatograms for AGEs and NAs. (A) TIC (Total ion chromatogram) for advanced glycation end-products, concentration: 200 ng/mL. (B) TIC for N-nitrosamines, concentration: 80 ng/mL.
